# Supplementary material
Source: publisher figshare collection journal article supplement (https://karger.figshare.com/ndownloader/files/16344707)
Supplement: Supplementary file 1 [file 16344707]

## Sheet: formatted
Table S4. One-year relative survival of patients diagnosed from 2000-2015 with poorly differentiated neuroendocrine neoplasms of the digestive tract (by cancer site) in the SEER 18 database, age-standardized using the ICSS 1 standard population.
				One-year relative survival (95% confidence interval)
Stage	Cancer site	N	2000-2015	2000-2004	2005-2009	2010-2015
Localized	Digestive System	426	0.79 (0.74-0.83)	0.77 (0.67-0.84)	0.78 (0.68-0.85)	0.80 (0.73-0.85)
	Esophagus	16	undef.	undef.	undef.	undef.
	Stomach	66	0.78 (0.66-0.86)	0.83 (0.69-0.91)	0.96 (0.77-0.99)	0.72 (0.52-0.85)
	Small Intestine	40	undef.	undef.	undef.	undef.
	Colon excluding Rectum	135	0.91 (0.84-0.95)	0.83 (0.64-0.93)	0.85 (0.63-0.95)	0.93 (0.84-0.97)
	Rectum and Rectosigmoid Junction	76	0.74 (0.60-0.84)	undef.	0.54 (0.26-0.75)	0.71 (0.47-0.85)
	Anus, Anal Canal and Anorectum	20	0.54 (0.42-0.65)	undef.	undef.	undef.
	Pancreas	52	0.74 (0.59-0.84)	0.50 (0.36-0.62)	0.77 (0.46-0.91)	0.78 (0.56-0.90)
	Liver and Intrahepatic Bile Duct	21	0.26 (0.11-0.44)	undef.	undef.	0.11 (0.02-0.28)
Regional	Digestive System	1097	0.65 (0.62-0.68)	0.65 (0.59-0.71)	0.67 (0.62-0.72)	0.64 (0.59-0.68)
	Esophagus	47	0.53 (0.37-0.66)	undef.	undef.	0.56 (0.42-0.68)
	Stomach	136	0.64 (0.55-0.71)	0.68 (0.52-0.80)	0.55 (0.39-0.68)	0.64 (0.49-0.76)
	Small Intestine	92	0.77 (0.66-0.85)	undef.	0.76 (0.56-0.88)	0.74 (0.58-0.84)
	Colon excluding Rectum	491	0.69 (0.64-0.73)	0.64 (0.54-0.72)	0.74 (0.66-0.81)	0.68 (0.61-0.74)
	Rectum and Rectosigmoid Junction	110	0.58 (0.47-0.67)	0.54 (0.30-0.73)	0.59 (0.41-0.73)	0.50 (0.36-0.63)
	Anus, Anal Canal and Anorectum	21	0.69 (0.48-0.83)	undef.	0.79 (0.49-0.92)	undef.
	Pancreas	162	0.64 (0.55-0.71)	0.66 (0.40-0.83)	0.63 (0.47-0.75)	0.61 (0.49-0.72)
	Liver and Intrahepatic Bile Duct	38	0.28 (0.16-0.40)	undef.	0.36 (0.21-0.52)	undef.
Distant	Digestive System	1959	0.30 (0.28-0.32)	0.25 (0.21-0.30)	0.29 (0.25-0.33)	0.33 (0.30-0.36)
	Esophagus	103	0.25 (0.17-0.34)	undef.	0.22 (0.12-0.34)	0.20 (0.10-0.32)
	Stomach	231	0.25 (0.19-0.31)	0.22 (0.11-0.35)	0.22 (0.14-0.32)	0.28 (0.20-0.38)
	Small Intestine	129	0.58 (0.49-0.66)	0.50 (0.28-0.69)	0.56 (0.41-0.68)	undef.
	Colon excluding Rectum	751	0.26 (0.23-0.30)	0.21 (0.15-0.28)	0.29 (0.23-0.35)	0.28 (0.23-0.33)
	Rectum and Rectosigmoid Junction	249	0.25 (0.20-0.31)	0.26 (0.15-0.39)	0.18 (0.09-0.30)	0.27 (0.19-0.36)
	Anus, Anal Canal and Anorectum	33	0.35 (0.19-0.52)	undef.	undef.	0.53 (0.37-0.67)
	Pancreas	433	0.35 (0.30-0.39)	0.25 (0.17-0.33)	0.28 (0.19-0.37)	0.41 (0.35-0.48)
	Liver and Intrahepatic Bile Duct	30	0.22 (0.11-0.36)	undef.	undef.	0.08 (0.03-0.16)
Total	Digestive System	3482	0.47 (0.45-0.49)	0.45 (0.41-0.48)	0.47 (0.44-0.50)	0.48 (0.46-0.51)
	Esophagus	166	0.37 (0.29-0.44)	undef.	0.37 (0.25-0.48)	0.34 (0.24-0.44)
	Stomach	433	0.45 (0.40-0.50)	0.52 (0.41-0.61)	0.40 (0.31-0.48)	0.45 (0.37-0.52)
	Small Intestine	261	0.69 (0.62-0.74)	0.66 (0.49-0.79)	0.67 (0.56-0.75)	0.70 (0.61-0.78)
	Colon excluding Rectum	1377	0.48 (0.45-0.50)	0.42 (0.37-0.48)	0.50 (0.44-0.55)	0.50 (0.45-0.54)
	Rectum and Rectosigmoid Junction	435	0.42 (0.37-0.47)	0.46 (0.36-0.57)	0.39 (0.30-0.48)	0.42 (0.34-0.49)
	Anus, Anal Canal and Anorectum	74	0.58 (0.45-0.69)	0.46 (0.21-0.67)	0.52 (0.33-0.68)	0.60 (0.36-0.77)
	Pancreas	647	0.45 (0.40-0.48)	0.35 (0.27-0.43)	0.42 (0.34-0.50)	0.49 (0.43-0.54)
	Liver and Intrahepatic Bile Duct	89	0.25 (0.16-0.35)	0.37 (0.15-0.59)	0.20 (0.08-0.38)	0.20 (0.09-0.33)
